# Supplementary material for: Automatic flow delay through passive wax valves for paper-based analytical devices
Source: Royal Society of Chemistry journal article supplement (doi:10.1039/d1lc00638j), 2021-01-01
Supplement: d1lc00638j1.pdf [file d1lc00638j1.pdf]

## Supplementary Material for

# Automatic flow delay through passive wax valves for paper-based analytical devices

Haixu Meng <sup>a</sup>, Chang Chen <sup>a,b</sup>, Yonggang Zhu <sup>a</sup>, Zhengtu Li <sup>c</sup>, Feng Ye <sup>c</sup>, Joshua Ho <sup>d</sup> and Huaying Chen<sup>a\*</sup>

<sup>a</sup> School of Mechanical Engineering and Automation, Harbin Institute of Technology, Shenzhen, Shenzhen 518055, China.

<sup>b</sup> Laboratory of Physical Chemistry and Soft Matter, Wageningen University & Research, Stippeneng 4, 6708 WE Wageningen, the Netherlands.

<sup>c</sup> State Key Laboratory of Respiratory Disease, National Clinical Research Center for Respiratory Disease, The First Affiliated Hospital of Guangzhou Medical University, Guangzhou, China

<sup>d</sup> School of Biomedical Sciences, Li Ka Shing Faculty of Medicine, The University of Hong Kong, Hong Kong, China

\* Corresponding Author: [chenhuaying@hit.edu.cn](mailto:chenhuaying@hit.edu.cn), Tel: +86 755 8615 3249

## 1. Introduction

Table S 1 A list of flow-delay techniques in paper microfluidics

| Valve opening method                                                        | Delay mechanism                                          | Delay range                                     | Limitations                                                | Application                                            | Reference                                        |
|-----------------------------------------------------------------------------|----------------------------------------------------------|-------------------------------------------------|------------------------------------------------------------|--------------------------------------------------------|--------------------------------------------------|
| Surfactant flows from downstream of the hydrophobic valve                   | A hydrophobic valve and a delay channel before the valve | Dependent on the length of the delay channel    | Sample waste in the delay channel.                         | ELISA                                                  | Lab Chip, 2012,12, 2909-2913                     |
| A bridging channel in the bottom layer was employed                         | The length of the bridging channel                       | Dependent on the length of the bridging channel | Sample waste in the bridging channel.                      | ELISA                                                  | Lab Chip, 2014, 14, 4042-4049                    |
| Surfactant flows through the wax valve                                      | Flow length in the valve and surfactant concentration    | about 1-11 minutes                              | The surfactant needs to be mixed with the sample.          | Human IgG detection                                    | Biosensors and Bioelectronics, 2020, 168, 112559 |
| Pre-dried surfactant was dissolved in the sample to flow through wax valves | Surfactant diffusion                                     | a few seconds to around 4 minutes               | The Delay mechanism was not well studied.                  | ELISA                                                  | Micromachines, 2019, 10, 837.                    |
| Fluid flow vertically through the wax valve by hydrostatic pressure         | Wax density in paper and layers of wax-coated paper      | 30 seconds to 2 hours                           | Multiple layers introduce fabrication complexity.          | Fluid flow control                                     | Analytical chemistry, 2010, 82, 4181-4187        |
| Melting of the wax valve                                                    | Manual control through a phase change                    | Any time period                                 | Requires additional equipment;<br>Complicated to fabricate | Fluid dosing                                           | Lab on a Chip, 2016, 16, 3969-3976               |
| Dissolving of the wax valve using organic solvents                          | Manual control of the dissolving                         | Any time period                                 | Requires manual addition of the reagents                   | Glucose detection                                      | Analytical Chemistry, 2019, 91, 5169-5175.       |
| Surfactant pre-dried a certain distance away from the wax valve             | Surfactant diffusion                                     | about 3.6 to 20 minutes                         | N/A                                                        | Detection of glucose or ethanol.<br>Sequential mixing. | ---                                              |

## 2. Methods

### 1.1. Boundary condition

The parameters used in this study were summarized in Table S1.

Table S2 The parameters used in the simulation

| <i>Parameters</i>                      | <i>Symbols</i>        | <i>Value/range</i>                          | <i>Unit</i>          |
|----------------------------------------|-----------------------|---------------------------------------------|----------------------|
| <i>Channel length before the valve</i> | $L_1$                 | 5.5, 5, 4, 3, 2 and 1                       | [mm]                 |
| <i>Valve length</i>                    | $L_2$                 | 0.5, 1, 2, 3, 4 and 5                       | [mm]                 |
| <i>Channel width</i>                   | $W_0$                 | 2                                           | [mm]                 |
| <i>Channel length after the valve</i>  | $L_3$                 | 22- $L_2$                                   | [mm]                 |
| <i>Paper strip thickness</i>           | $t$                   | 0.18                                        | [mm]                 |
| <i>Surface tension</i>                 | $\gamma$              | 0.072                                       | [N/m]                |
| <i>Surface tension in valve</i>        | $\gamma_{valve}$      | 0.072                                       | [N/m]                |
| <i>Contact angle</i>                   | $\theta$              | 83                                          | [deg]                |
| <i>Contact angle in valve</i>          | $\theta_{valve}$      | 90, 83, 66                                  | [deg]                |
| <i>Pore radius</i>                     | $R_c$                 | 11                                          | [ $\mu\text{m}$ ]    |
| <i>Valve pore radius</i>               | $R_{cvalve}$          | 11, 8, 5.5, 5, 4, 3.5 and 3                 | [ $\mu\text{m}$ ]    |
| <i>Pore size distribution index</i>    | $lp$                  | 2                                           | 1                    |
| <i>Porosity</i>                        | $\varepsilon$         | 0.69                                        | 1                    |
| <i>Valve porosity</i>                  | $\varepsilon_{valve}$ | 0.9, 0.69, 0.4, 0.2, 0.1, 0.01<br>and 0.001 | 1                    |
| <i>Air density</i>                     | $\rho_{air}$          | 1                                           | [kg/m <sup>3</sup> ] |
| <i>Liquid density</i>                  | $\rho_{liquid}$       | 996                                         | [kg/m <sup>3</sup> ] |
| <i>Air viscosity</i>                   | $\mu_{air}$           | 1.76 e-5                                    | [Pa*s]               |
| <i>Liquid viscosity</i>                | $\mu_{liquid}$        | 0.86                                        | [mPa*s]              |

The entry capillary pressure ( $p_{ec}$ ) was calculated by:

$$p_{ec} = \frac{2\gamma \cos \theta}{R_c} \quad \text{Equation S1}$$

Where  $\gamma$  was the surface tension,  $R_c$  was the pore radius and  $\theta$  was the contact angle.

Since the liquid drop at the inlet, PDMS wall, and channel width may greatly affect the flow speed, a coefficient  $k$  (=0.041) was added to Equation S1 to correct the difference between the ideal situation and the real experiment:

$$p_{ec} = \frac{2k\gamma \cos \theta}{R_c} \quad \text{Equation S2}$$

The capillary pressure (outlet boundary condition) was given by:

$$p_c = p_{ec} \frac{1}{(\bar{s}_w)^{1/\lambda_p}} \quad \text{Equation S3}$$

where  $p_{ec}$  is the entry capillary pressure,  $\bar{s}_w$  is the mean volume fraction of the wetting phase and  $\lambda_p$  was the pore distribution index.

The relative permeabilities for the wetting and non-wetting phases, based on the Brooks and Corey model, were given by

$$\kappa_{rw} = (\bar{s}_w)^{(3+\frac{2}{\lambda_p})} \quad \text{Equation S4}$$

$$\kappa_{rn} = \bar{s}_n^2 (1 - (1 - \bar{s}_n))^{(1+\frac{2}{\lambda_p})} \quad \text{Equation S5}$$

The permeability ( $\kappa$ ) of paper and valve region was calculated by:

$$\kappa = \frac{\varepsilon R_c^2}{8} \quad \text{Equation S6}$$

Where  $\varepsilon$  was the porosity and  $R_c$  was the pore radius.

## 1.2. Device fabrication

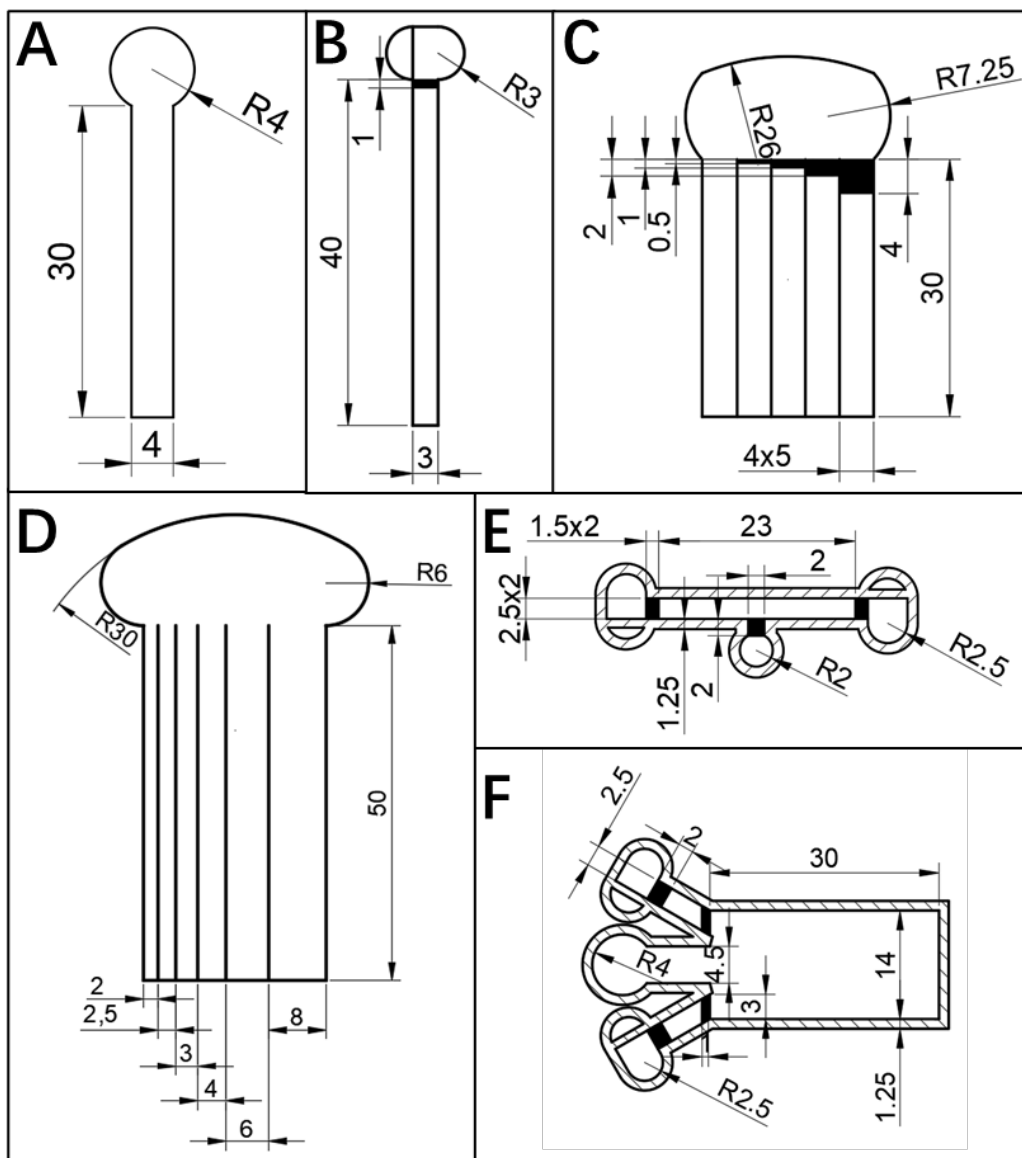

Figure S1 AutoCAD drawings for various chips. The  $\mu$ PADs for (A) flow study in PDMS surrounded channels, (B) glucose detection, (C) valve length study (with another similar design of valve length for 6, 8, 10, 12, 14), (D) channel width study, and (E) mixing and (F) parallel flow patterning after sequential loading. The unit of all dimensions is mm.

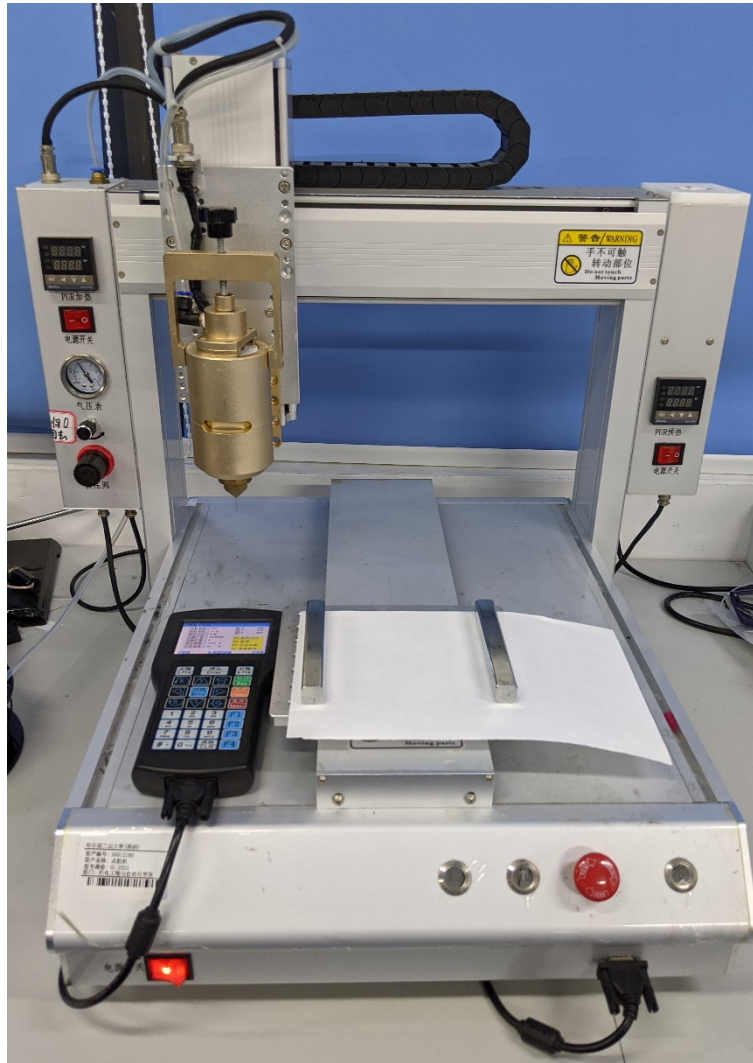

Figure S2 The automatic dispenser for PDMS wall printing.

### 1.3. Model validation

A mesh convergence test was performed and the grid of the valve area was encrypted to determine the size of mesh elements to acquire accurate results (Figure S3A). Afterward, a model with the same boundary conditions was created to evaluate the appropriateness of all critical simulation parameters (e.g. in Darcy's law) except for the properties of valves and fluids (Figure S3B).

Modified Lucas-Washburn equation<sup>1</sup> gave the analytical expression of the length of the liquid absorbed by the vertical paper strip:

$$L = \sqrt{\frac{k\gamma R_c t \cos \theta}{2\mu}} \quad \text{Equation S7}$$

Where  $L$  was the height of the liquid front,  $\gamma$  was the surface tension,  $R_c$  was the pore radius,  $\theta$  was the contact angle,  $\mu$  was the dynamic viscosity of water, and  $k$  ( $=0.041$ ) was the correction coefficient.

The simulation results were compared with the data from both experiments and modified the Lucas-Washburn equation. The error was found less than 4.6% (Figure S3C).

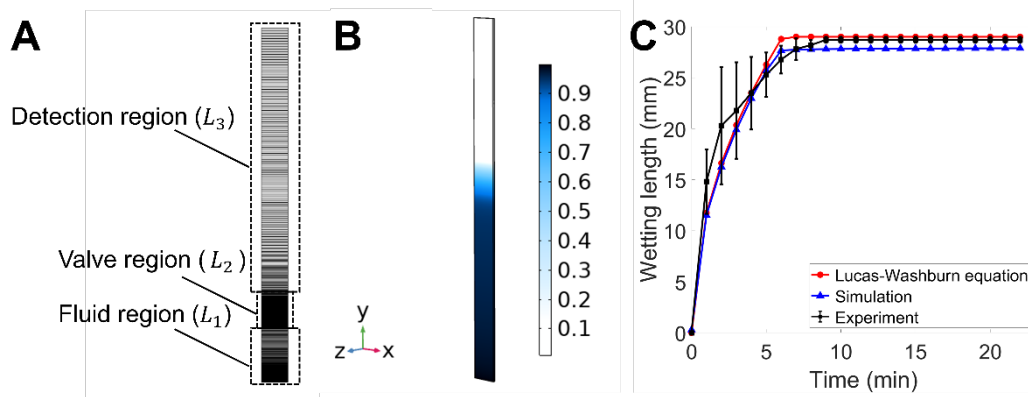

Figure S3 The model and validation results. (A) The 2D model and mesh created for the numerical study. The chip had three parts: a fluid region, a valve region, and a detection region. (B) Water saturation (3D) in the paper strip after 2 minutes. (C) The wetting length acquired from experiments, Lucas-Washburn equation, and simulation modified with a constant  $k$ .

#### 1.4. Characterization of the wax valve

Table S3 Parameters of time-delay experiments.

| Experiments                         | Surfactant concentration | Diffusion distance | Loading volume | Surfactant type |
|-------------------------------------|--------------------------|--------------------|----------------|-----------------|
| Diffusion distance (mm)             | 1                        | 1-8                | 1              | 1               |
| Surfactant type                     | Triton X-100             |                    |                | Tween 20        |
| Surfactant concentration (% , v/v)  | 30                       |                    |                |                 |
| Surfactant volume ( $\mu\text{L}$ ) | 0.6-2.2                  | 2.2                | 2.2            | 0.4-2.2         |
| Loading liquid                      | DI water                 |                    |                |                 |
| Loading volume ( $\mu\text{L}$ )    | 30                       | 60                 | 10-30          | 30              |

### 3. Results

#### 2.1 The numerical study of the flow delay mechanism

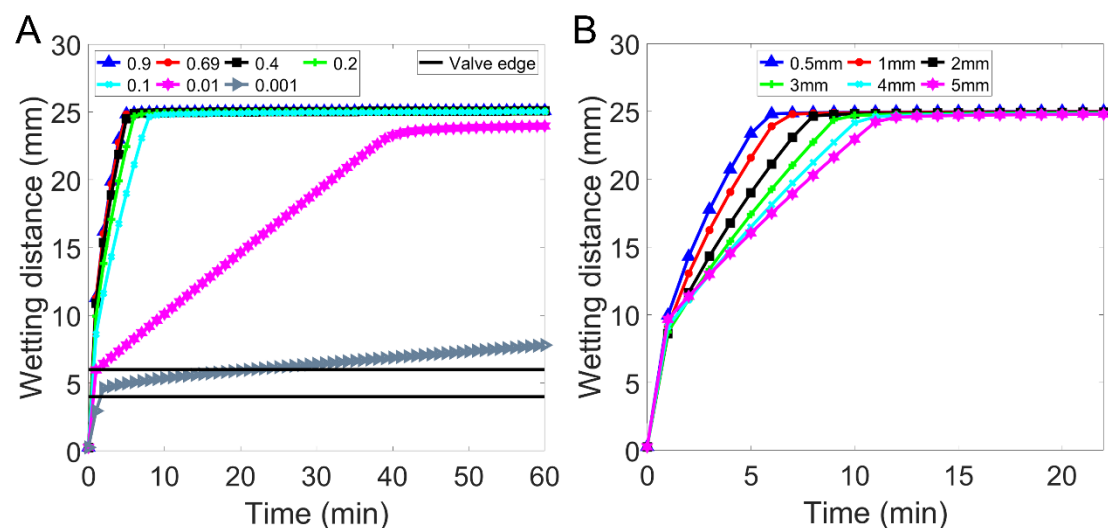

Figure S4 The numerical study of water flow in paper with valves. The wetting length when (A) the porosity and (B) the valve length varied.

#### 2.2 Characterization of the wax valve

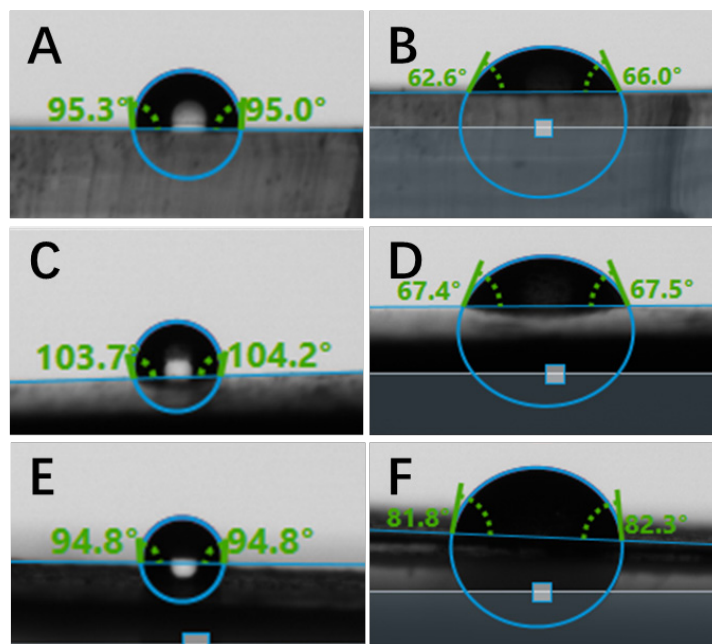

Figure S5 The photos for contact angle measurement. The photos of (A) water and (B) surfactant solution on the PDMS surface. The photos of (C) water and (D) surfactant solution on solid wax ink surface. The photos of (E) water and (F) surfactant solution on wax printed filter paper. All surfactant solution is 1.5% (v/v) Triton X-100 in DI water.



Table S4 The measured contact angle.

| Liquid             | Surfactant solution |       |                   | Water |        |                   |
|--------------------|---------------------|-------|-------------------|-------|--------|-------------------|
| Substrate          | PDMS                | Wax   | Wax-printed paper | PDMS  | Wax    | Wax-printed paper |
| Contact angle      | 66.8°               | 66.0° | 81.5°             | 95.9° | 103.9° | 94.9°             |
| Standard deviation | 5.0°                | 3.2°  | 2.0°              | 1.4°  | 0.7°   | 2.2°              |

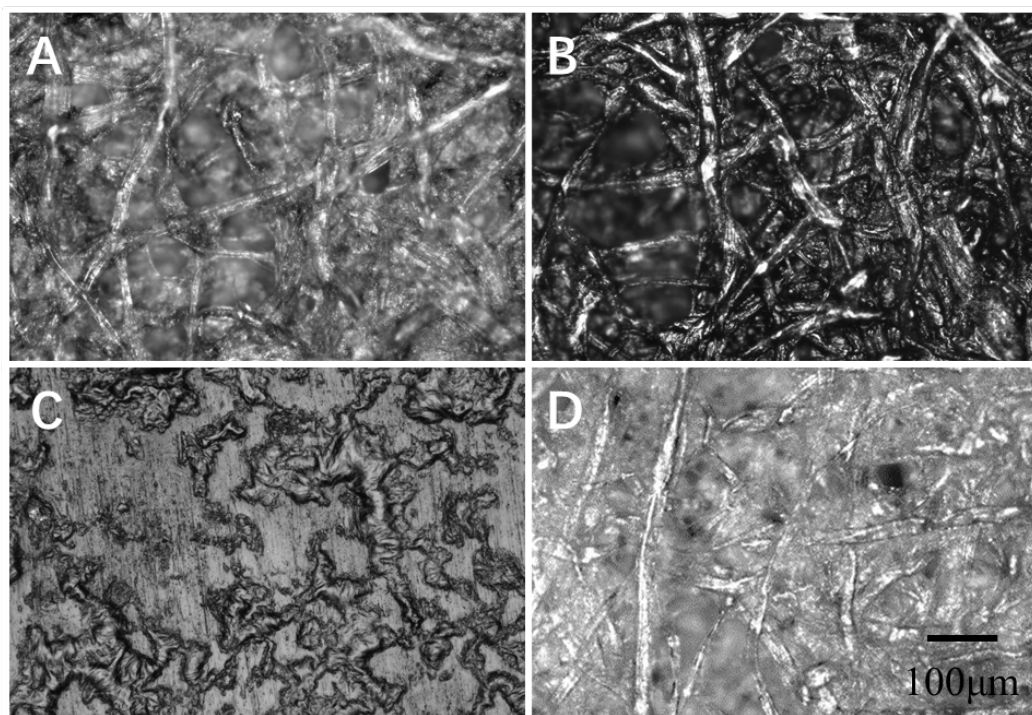

Figure S6 Micro-optical photos of the filter paper. The filter paper printed (A) one time and (B) three times on each side. (C) The filter paper with six-time wax printing and heated in a vacuum oven. (D) The raw filter paper

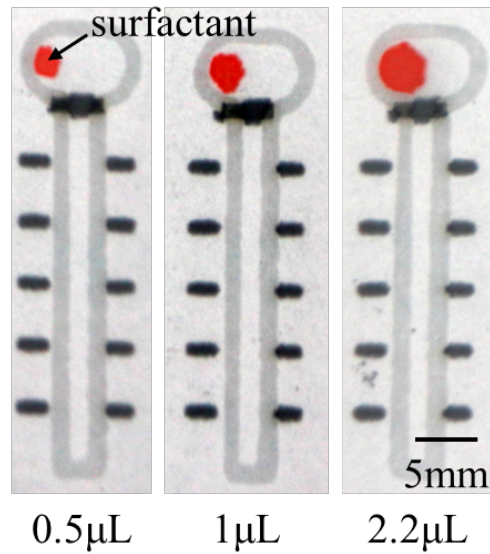

Figure S7 The photos of devices without the PDMS barrier for the surfactant loading zone. Red dye was added to the surfactant to demonstrate the spreading area of different surfactant volume.

### 2.3 High-sensitivity glucose detection

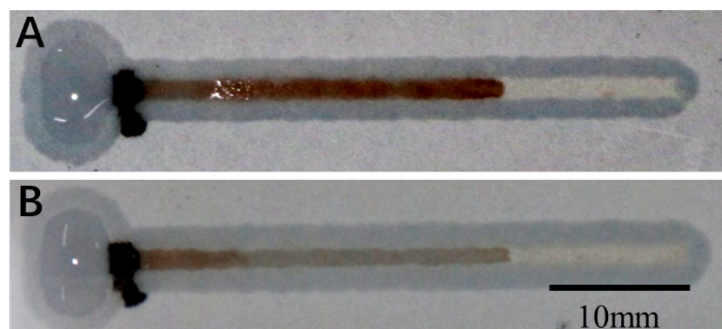

Figure S8 The photos of  $\mu$ PADs for glucose detection. (A) The  $\mu$ PAD detecting 200 mg/dL glucose solution 10 minutes after valve opening. The color length was equal to the wetting length. (B) The  $\mu$ PAD detecting 20 mg/dL glucose solution 10 minutes after valve opening. The color length was shorter than the wetting length.

## 4. Supplementary videos

Supplementary video S1 The PDMS barrier printing process using a dispenser.

Supplementary video S2 Flow of red dye in PDMS channels of different widths.

Supplementary video S3 Flow of red dye with surfactant (1.5% v/v) in PDMS channels of different widths.

Supplementary video S4 Flow of red dye with surfactant (1.5% v/v) through wax valves of different lengths.

Supplementary video S5 Sequential loading process of green and red dye using time-delay valves.

Supplementary video S6 Parallel flow patterning of blue, yellow, and red dye using time-delay valves.

#### Reference

1. E. W. Washburn, *Physical review*, 1921, **17**, 273.
